# Supplementary material for: Development of novel monoclonal antibodies against nsp12 of SARS-CoV-2
Source: Springer Nature journal article supplement (doi:10.1186/s12985-022-01948-2), 2022-12-10
Supplement: MOESM1 [file 23811552]

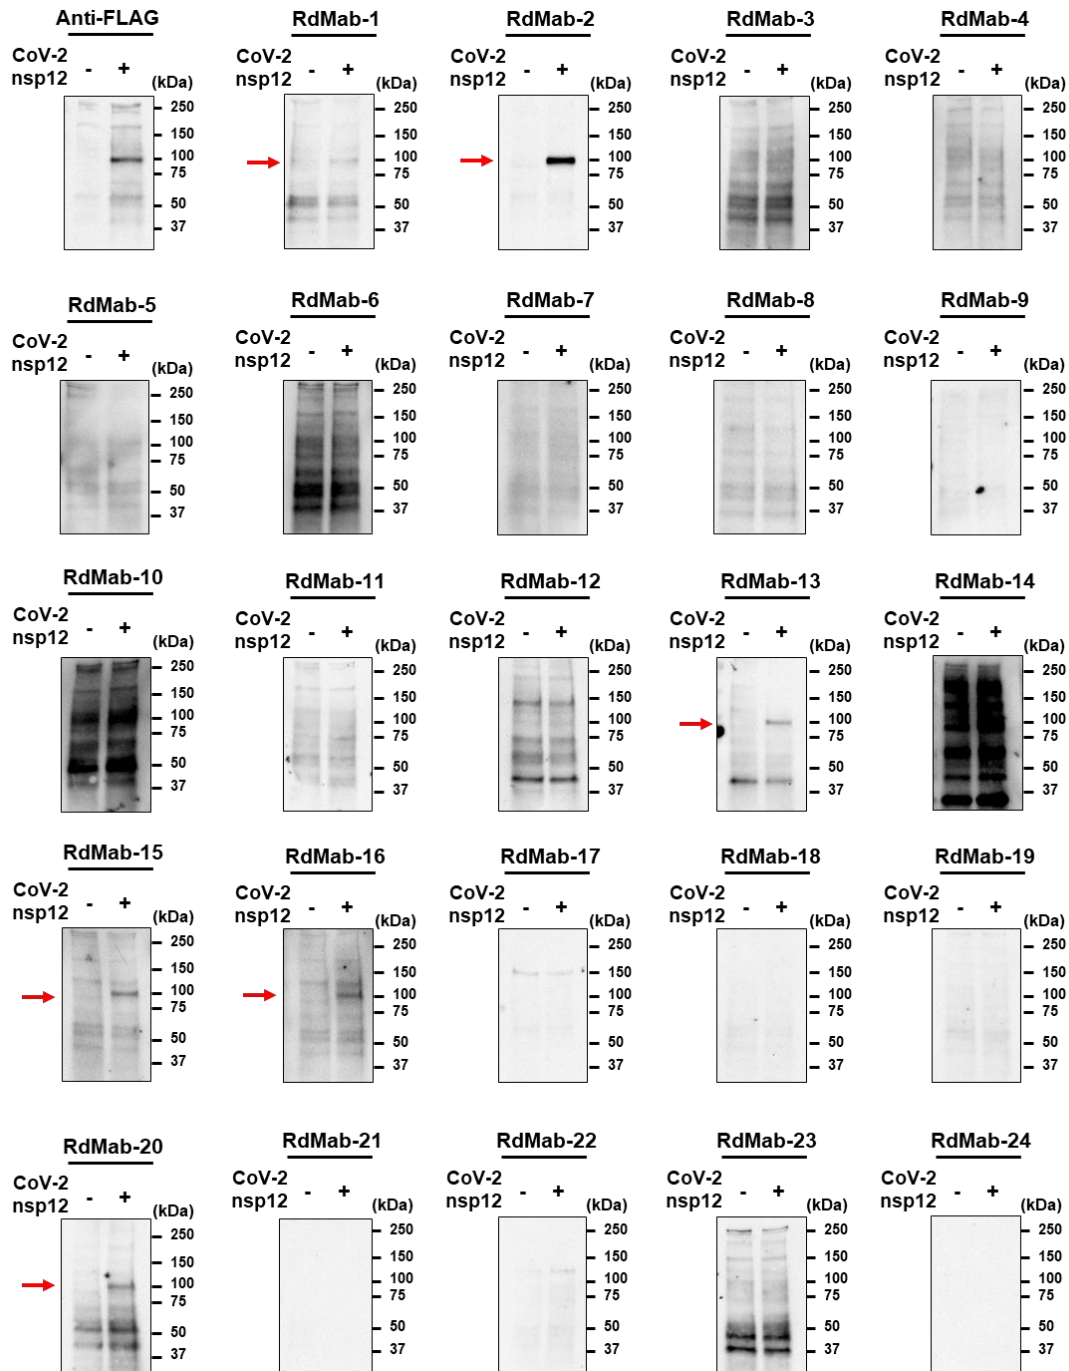

**Fig. S1. Screening of anti-nsp12 mouse monoclonal antibodies using the culture supernatant of hybridomas**

Western blotting analysis to detect a FLAG-tagged nsp12 of SARS-CoV-2 transiently expressed in 293T cells. The FLAG-tagged nsp12 was detected using an anti-FLAG antibody (M2) and the culture supernatant of hybridomas.

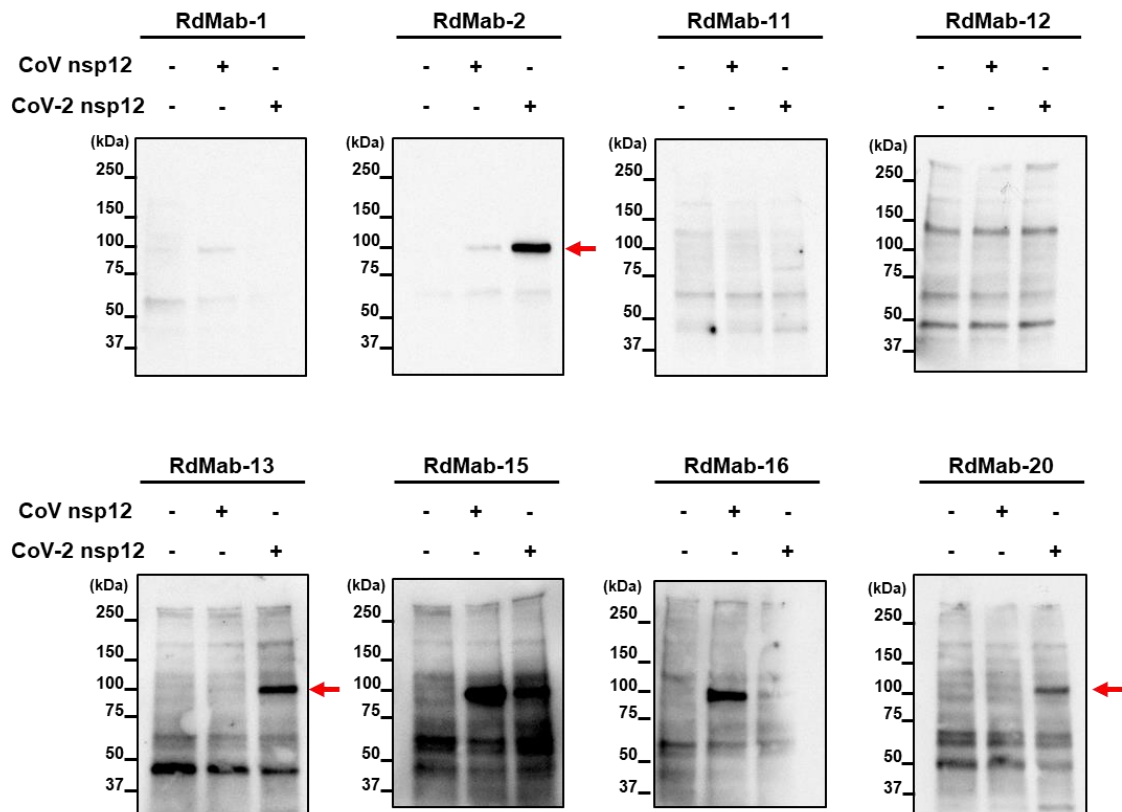

**Fig. S2. Selection of anti-nsp12 mouse monoclonal antibodies to discriminate between nsp12 of SARS-CoV and SARS-CoV-2**

Western blotting analysis to detect a FLAG-tagged nsp12 of SARS-CoV and SARS-CoV-2 transiently expressed in 293T cells. The FLAG-tagged nsp12 was detected using the culture supernatant of hybridomas.
